# Supplementary material for: The performance of optic disc-macula distance to disc-diameter ratio in qualitative and quantitative assessment of the optic disc size
Source: Research Square preprint supplement (doi:10.21203/rs.3.rs-4704192/v1), 2024-10-21
Supplement: Supplementary file 1 [file 8a6b41e9d4181bbac809a0e7.xlsx]

## Sheet: シート1 - Table 2   Patients’ demo
Table 2 Patients’ demographics and planimetry data of the second cohort
patients’ and ocular demographics
number of patients (male) / eyes (right)	200 (95) / 200 (108)
age	63.3 ± 11.5
refractive error in spherical equivalent (range)	-0.22 ± 0.30 D (-0.88 to +0.50)
patients' or ocular morbidities
daibetes without retinopathy	59
diabetes with retinopathy	15
hypertensive/sclerotic changes of retinal vessels	31
fellow eyes of retinal vein occlusion	10
posterior vitreous detachment	10
retinal tear/peripheral degeneration	19
fellow eyes of retinal detachment	13
fellow eyes of preretinal membrane or macular hole	10
ocular hypertension	10
open-angle glaucoma	6
glaucoma suspects	7
migraine/scotoma scintillance	4
others	6
planimetry data and disc area prediction
	Mean ± SD (range)		KS test p value
vertical disc diameter (mm)	1.86 ± 0.19 (1.48 - 2.33)		p=0.518
horizontal disc diameter (mm)	1.68 ± 0.16 (1.28 - 2.14)		p=0.276
disc-macula distance (mm)	4.77 ± 0.16 (4.34 - 5.22) ⏋*		p=0.083
calculated disc area (㎟)	2.48 ± 0.46 (1.60 - 3.73) ⏌ ⏋		p=0.151
DM/DD	2.71 ± 0.24 (2.20 - 3.23) ☨		p=0.900
predicted disc area (㎟)	2.53 ± 0.39 (1.81 - 3.57) ⏌		p=0.186
pDA/cDA ratio	1.03 ± 0.07 (0.86 - 1.25)		p=0.162
data are expressed as mean ± SD (range)	KS test: Kolmogorov-Smirnov test
DM/DD: disc-macula distance to disc diameter ratio	pDA/cDA: predicted disc area/calculated disc area
* correlation between disc area and disc-macula distance: r=0.197, p=0.005
☨ correlation between calculated and predicted disc area : r=0.930, p<0.001
