# Supplementary material for: The performance of optic disc-macula distance to disc-diameter ratio in qualitative and quantitative assessment of the optic disc size
Source: Research Square preprint supplement (doi:10.21203/rs.3.rs-4704192/v1), 2024-10-21
Supplement: Supplementary file 2 [file ce8807d6e63a1fdde61dc184.xlsx]

## Sheet: シート1 - Table 1   Patients’ demo
Table 1 Patients’ demographics, ocular characteristics, and planimetry data of the first cohort
Demographic data
number of patients (male ) / eyes (right)	300 (146) / 300 (148)	eyes with glaucoma and related conditions (%)			73 (28%)
age	65.1 ± 10.3	glaucoma suspects			16 (22%)
duration of diabetes in years	9.9 ± 7.7	normal-tension glaucoma			40 (55%)
refractive error in spherical equivalent (range)	- 0.11 ± 1.22 D (- 3.25 to + 2.50)	ocular hypertension			3 (4%)
pseudophakic eyes (%)	27 (9%)	primary open-angle glaucoma			8 (11%)
eyes with retinopathy (%)	66 (22%)	primary angle-closure glaucoma			6 (8%)
Planimetry data
	Mean ± SD (range)	CV (%)	correlation with refraction	P value	KS test
vertical disc diameter (mm)	1.86 ± 0.19 (1.38 - 2.43)	10.2	r=0.045	p=0.497	p=0.887
horizontal disc diameter (mm)	1.67 ± 0.17 (1.29 - 2.22)	10.2	r=0	p=0.967	p=0.499
disc-macula distance (mm)	4.80 ± 0.23 (4.08 - 5.53) ⏋* ⏋	4.8	r= -0.226	p<0.001	p=0.334
measured disc area (㎟)	2.49 ± 0.45 (1.59 – 4.10) ⏌ ☨ ⏋⌗	18.1	r=0.001	p=0.984	p=0.435
calculated disc area (㎟)	2.46 ± 0.46 (1.52 - 4.11) ⏌ ⏌	18.7	r=0.012	p=0.831	p=0.404
DM/DD	2.74 ± 0.26 (2.06 - 3.71)	9.5	r= -0.155	p=0.007	p=0.394
n=300, data are expressed as mean ± SD	CV: coefficient of variation	KS test: Kolmogorov-Smirnov test
DM/DD: disc-macula distance to disc diameter ratio
* correlation between disc-macula distance and measured disc area : r=0.195, p<0.001
☨ correlation between disc-macula distance and calculated disc area : r=0.224, p<0.001
⌗ correlation between measured and calculated disc area: r= 0.994, p<0.001
